# Supplementary material for: Tiny predators avoid herbivorous caterpillar traces to prevent revolutionary predation
Source: Research Square preprint supplement (doi:10.21203/rs.3.rs-6643361/v1), 2025-05-29
Supplement: Supplementary file 1 [file 4249c59c638c953f2a4debd8.xlsx]

## Sheet: Sheet1
Tiny predators avoid herbivorous caterpillar traces to prevent revolutionary predation
Shiori Kinto* and Shuichi Yano
Oviposition avoidance of predatory mites against caterpillar traces
Predatory mites	N. womersleyi
Caterpillar	T. japonica		T. oldenlandiae		B. mori		P. xuthus
NO.	Trace+	Trace−	Trace+	Trace−	Trace+	Trace−	Trace+	Trace−
1	0	2	0	2	0	1	0	1
2	0	2	1	0	0	1	0	1
3	0	1	0	1	0	1	0	1
4	0	1	0	1	2	1	0	1
5	0	1	0	1	0	2	0	1
6	0	1	0	1	0	1	0	1
7	0	1	1	0	0	1	0	1
8	0	1	0	1	0	2	0	1
9	0	1	0	1	0	1	0	1
10	0	2	0	1	0	1	0	1
11	0	1	0	1	0	1	0	1
12	0	2	0	2	0	1	0	1
13	0	1	0	1	0	1	0	1
14	0	1	0	1	0	1	1	1
15	1	0			0	1
16	0	2			1	0
17	0	1			0	2
18	0	1			0	1
19	0	2			0	1
20	1	0			0	1
21	0	2			0	1
22	0	1			1	0
23	0	1			0	2
24	0	1			0	2
25	0	2			0	1
26	0	1			0	2
27	0	1			0	2
28					0	1
29					0	1
30					0	1
31					0	1
32					0	1
33
34
35
Predatory mites	E. sojaensis
Caterpillar	T. japonica		T. oldenlandiae		B. mori		P. xuthus
NO.	Trace+	Trace−	Trace+	Trace−	Trace+	Trace−	Trace+	Trace−
1	0	2	0	2	0	1	0	1
2	0	1	0	2	0	1	0	1
3	0	1	0	2	0	1	0	1
4	0	2	0	1	0	1	1	0
5	0	2	0	1	0	2	0	1
6	0	1	0	1	0	1	0	1
7	0	1	0	1	0	1	0	1
8	0	1	0	1	0	1	0	1
9	0	1	0	1	0	2	0	1
10	0	1	0	2	0	2	0	1
11	0	2	0	1	0	1	0	1
12	0	2	0	1	0	1	0	1
13	0	1	1	1	0	1	0	1
14	0	1	0	2	0	1	0	2
15	0	2	0	1	0	1	0	2
16	0	1	0	2	0	1	0	1
17	0	2	0	1	0	1
18	0	1	1	1	0	1
19	0	2			0	1
20	0	2			0	2
21	0	2			0	1
22	0	2			0	1
23	1	0			0	1
24	0	2			0	1
25	0	2			0	2
26	0	1			0	1
27	0	1			0	1
28	1	1			0	2
29	0	2			0	1
30	0	1
31	0	2
32
33
34
35
